# Supplementary material for: The complete chloroplast genome of Onobrychis gaubae (Fabaceae-Papilionoideae): comparative analysis with related IR-lacking clade species
Source: PubMed Central journal article supplement (PMC8858513; doi:10.1186/s12870-022-03465-4), 2022-02-19
Supplement: 12870_2022_3465_MOESM5_ESM.pdf [file 12870_2022_3465_MOESM5_ESM.pdf]

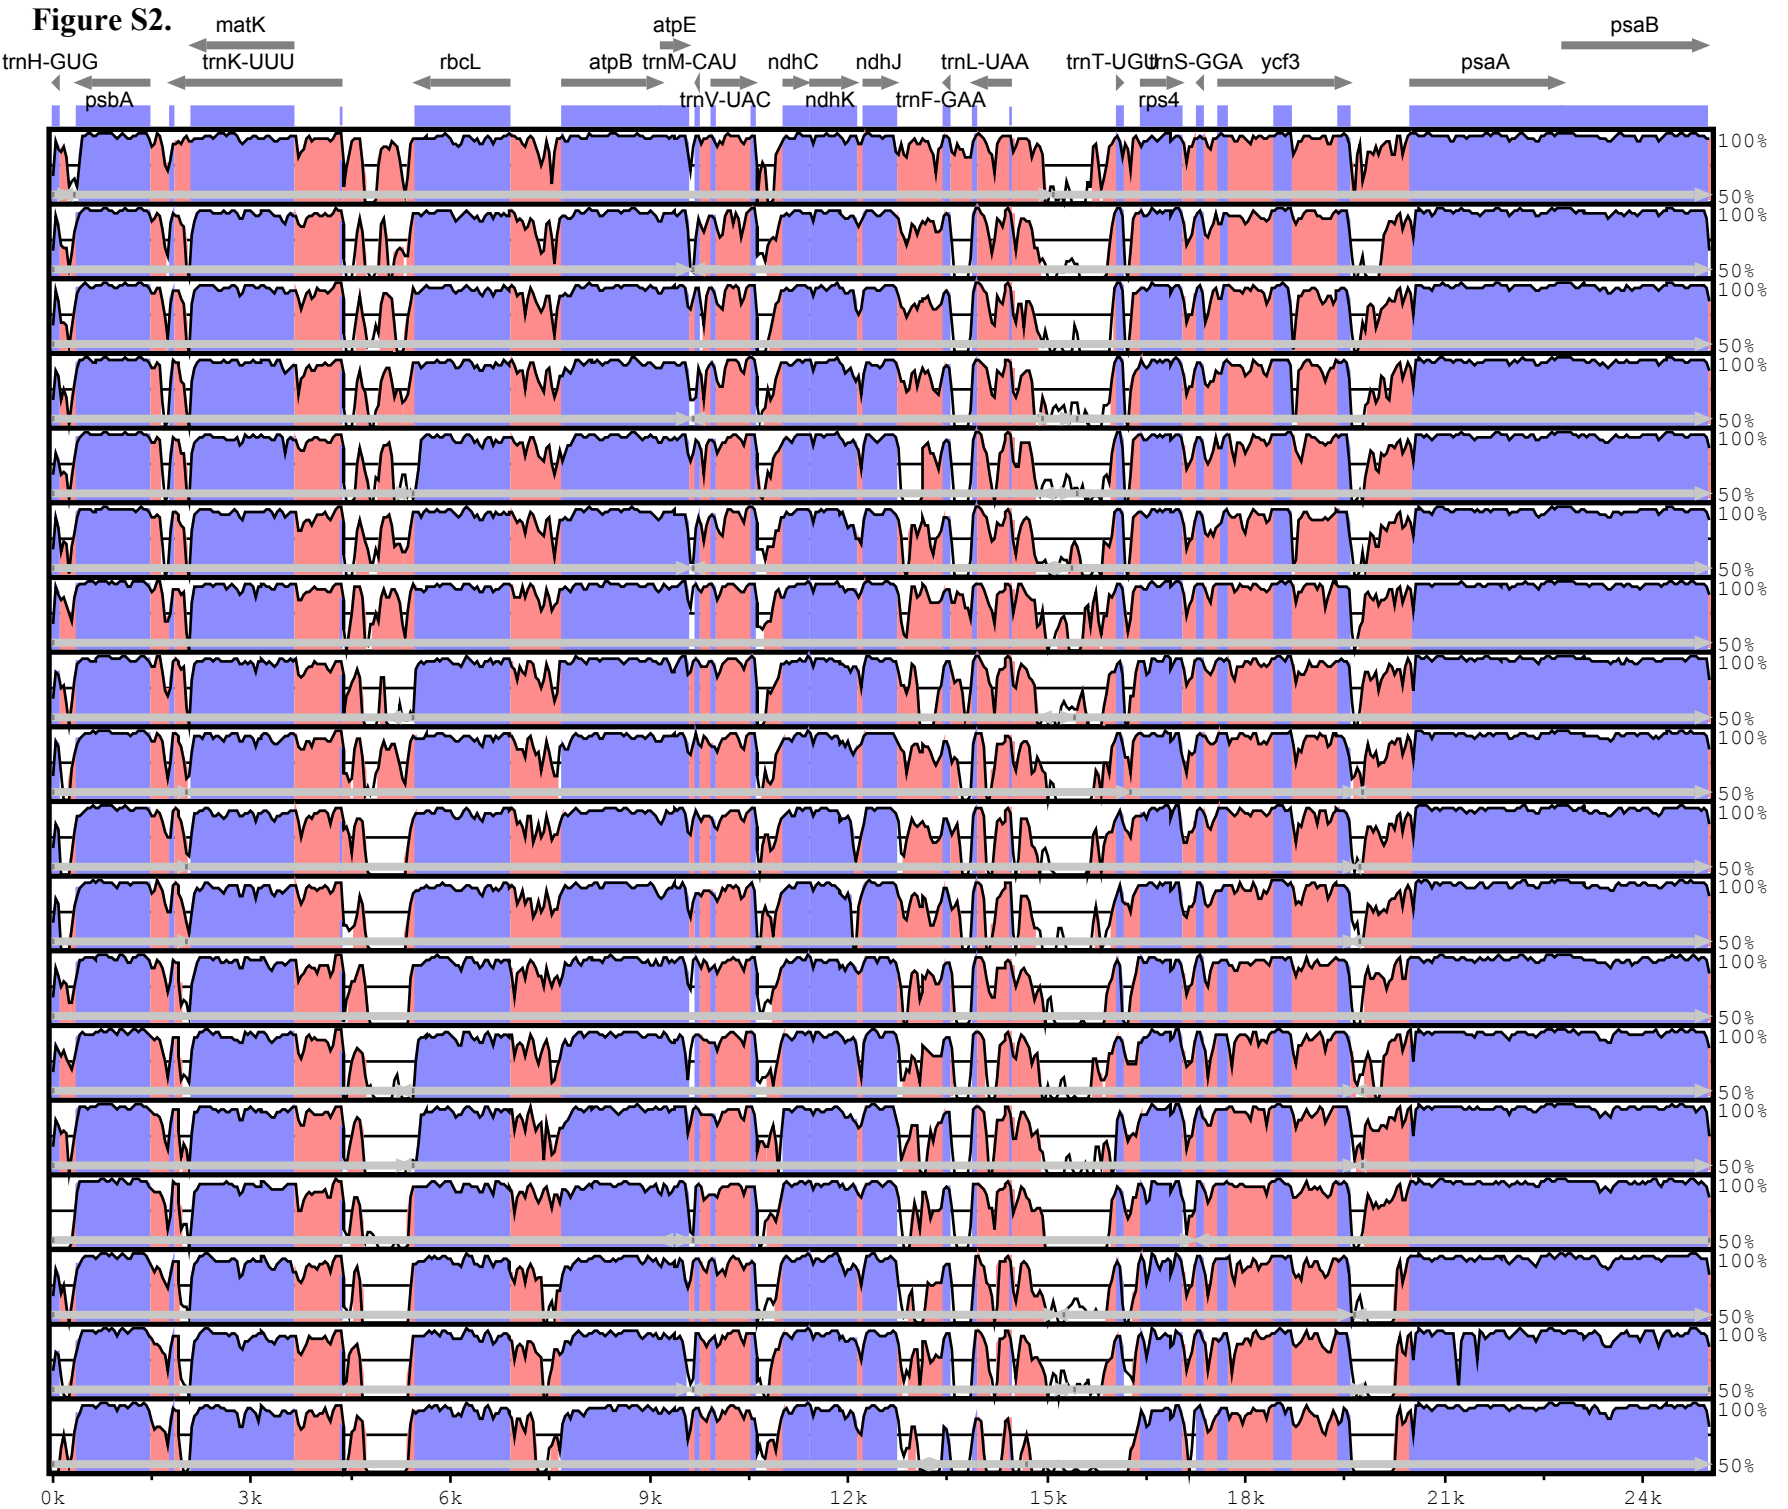

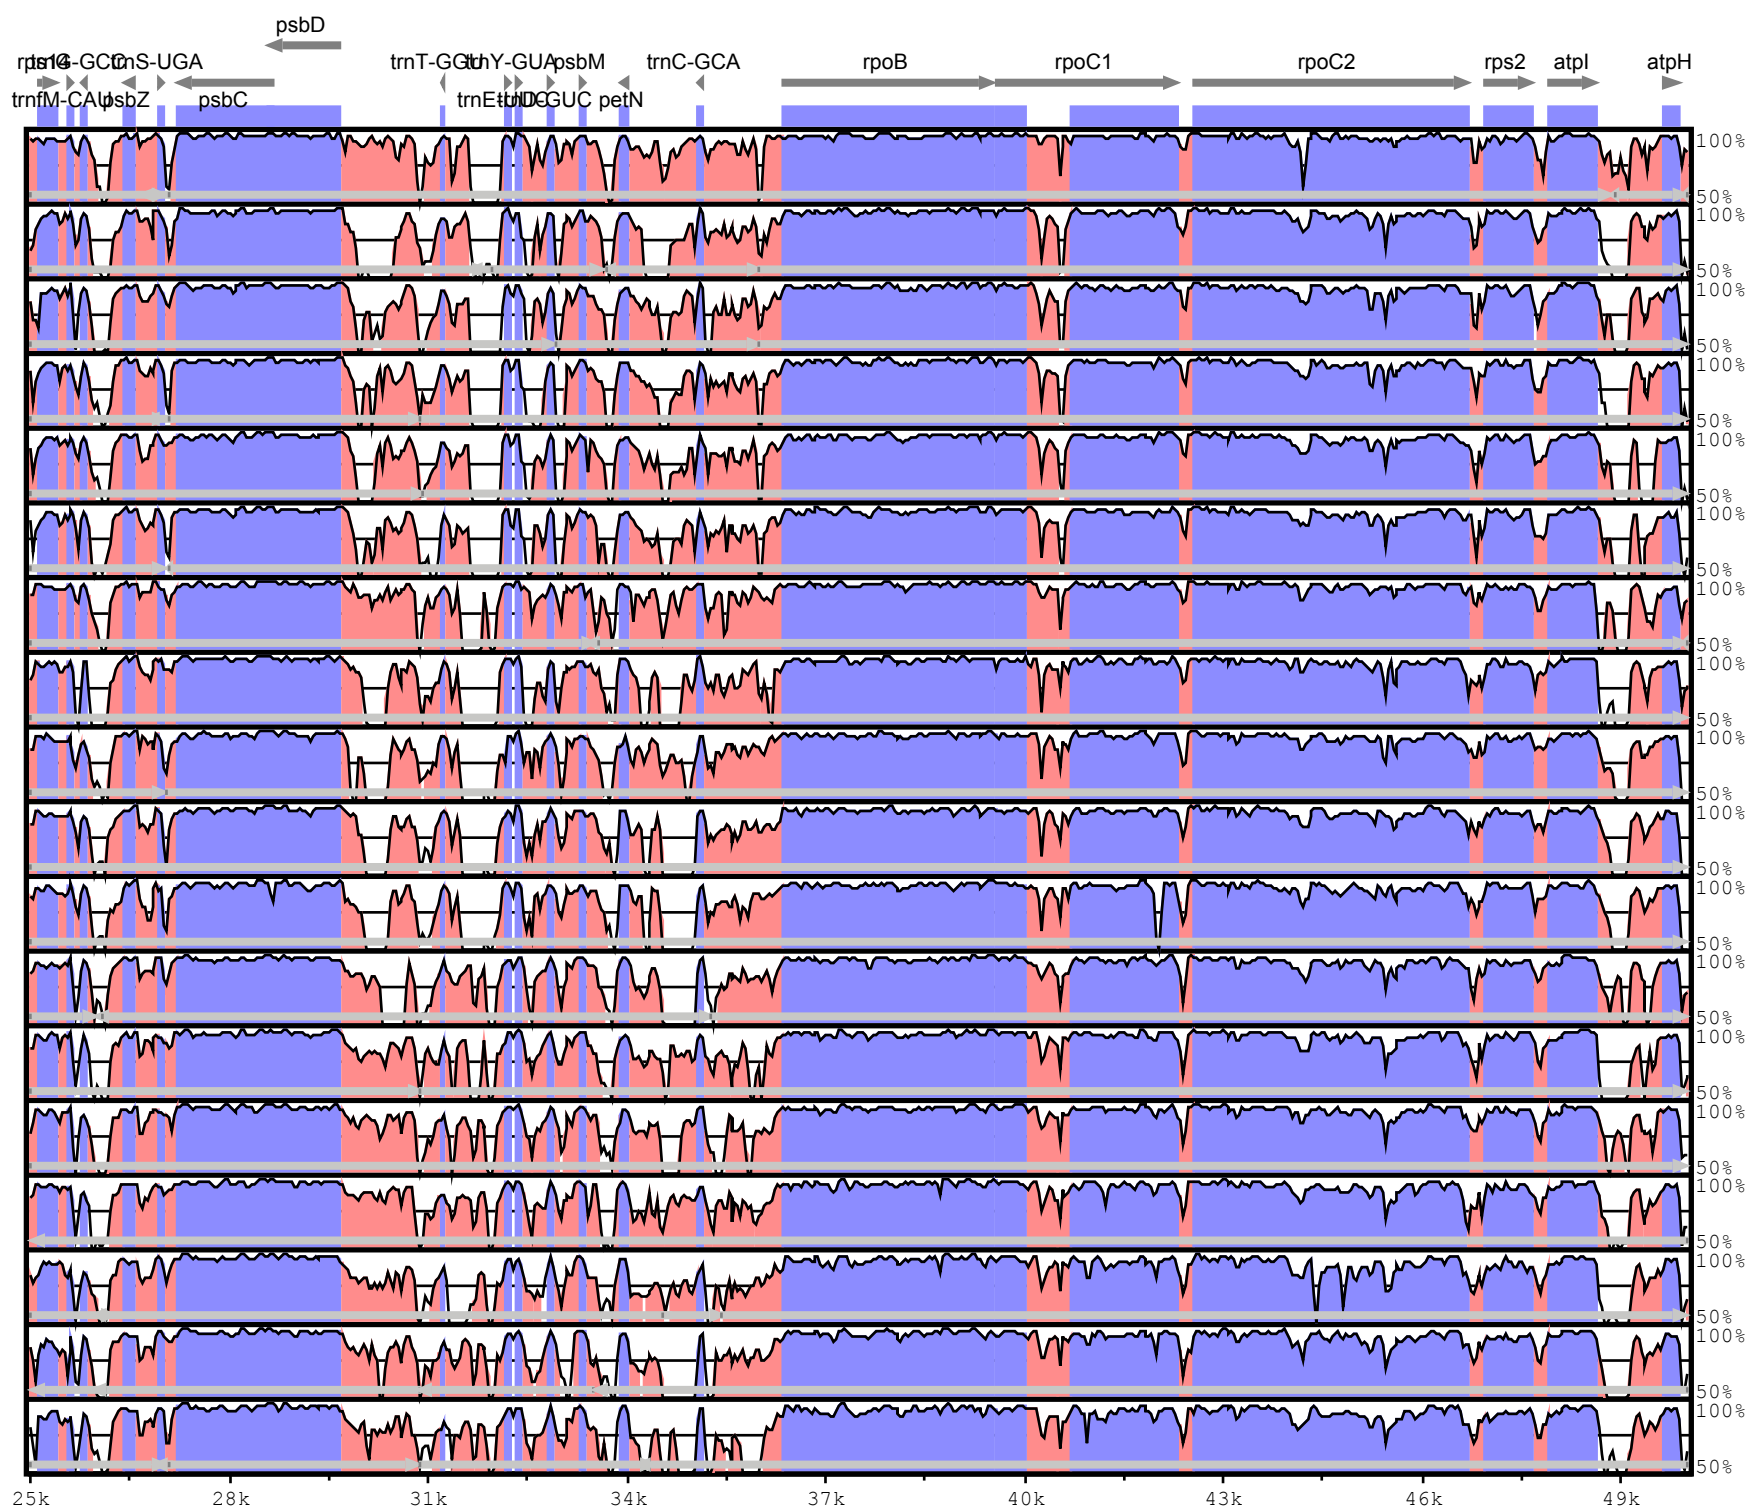





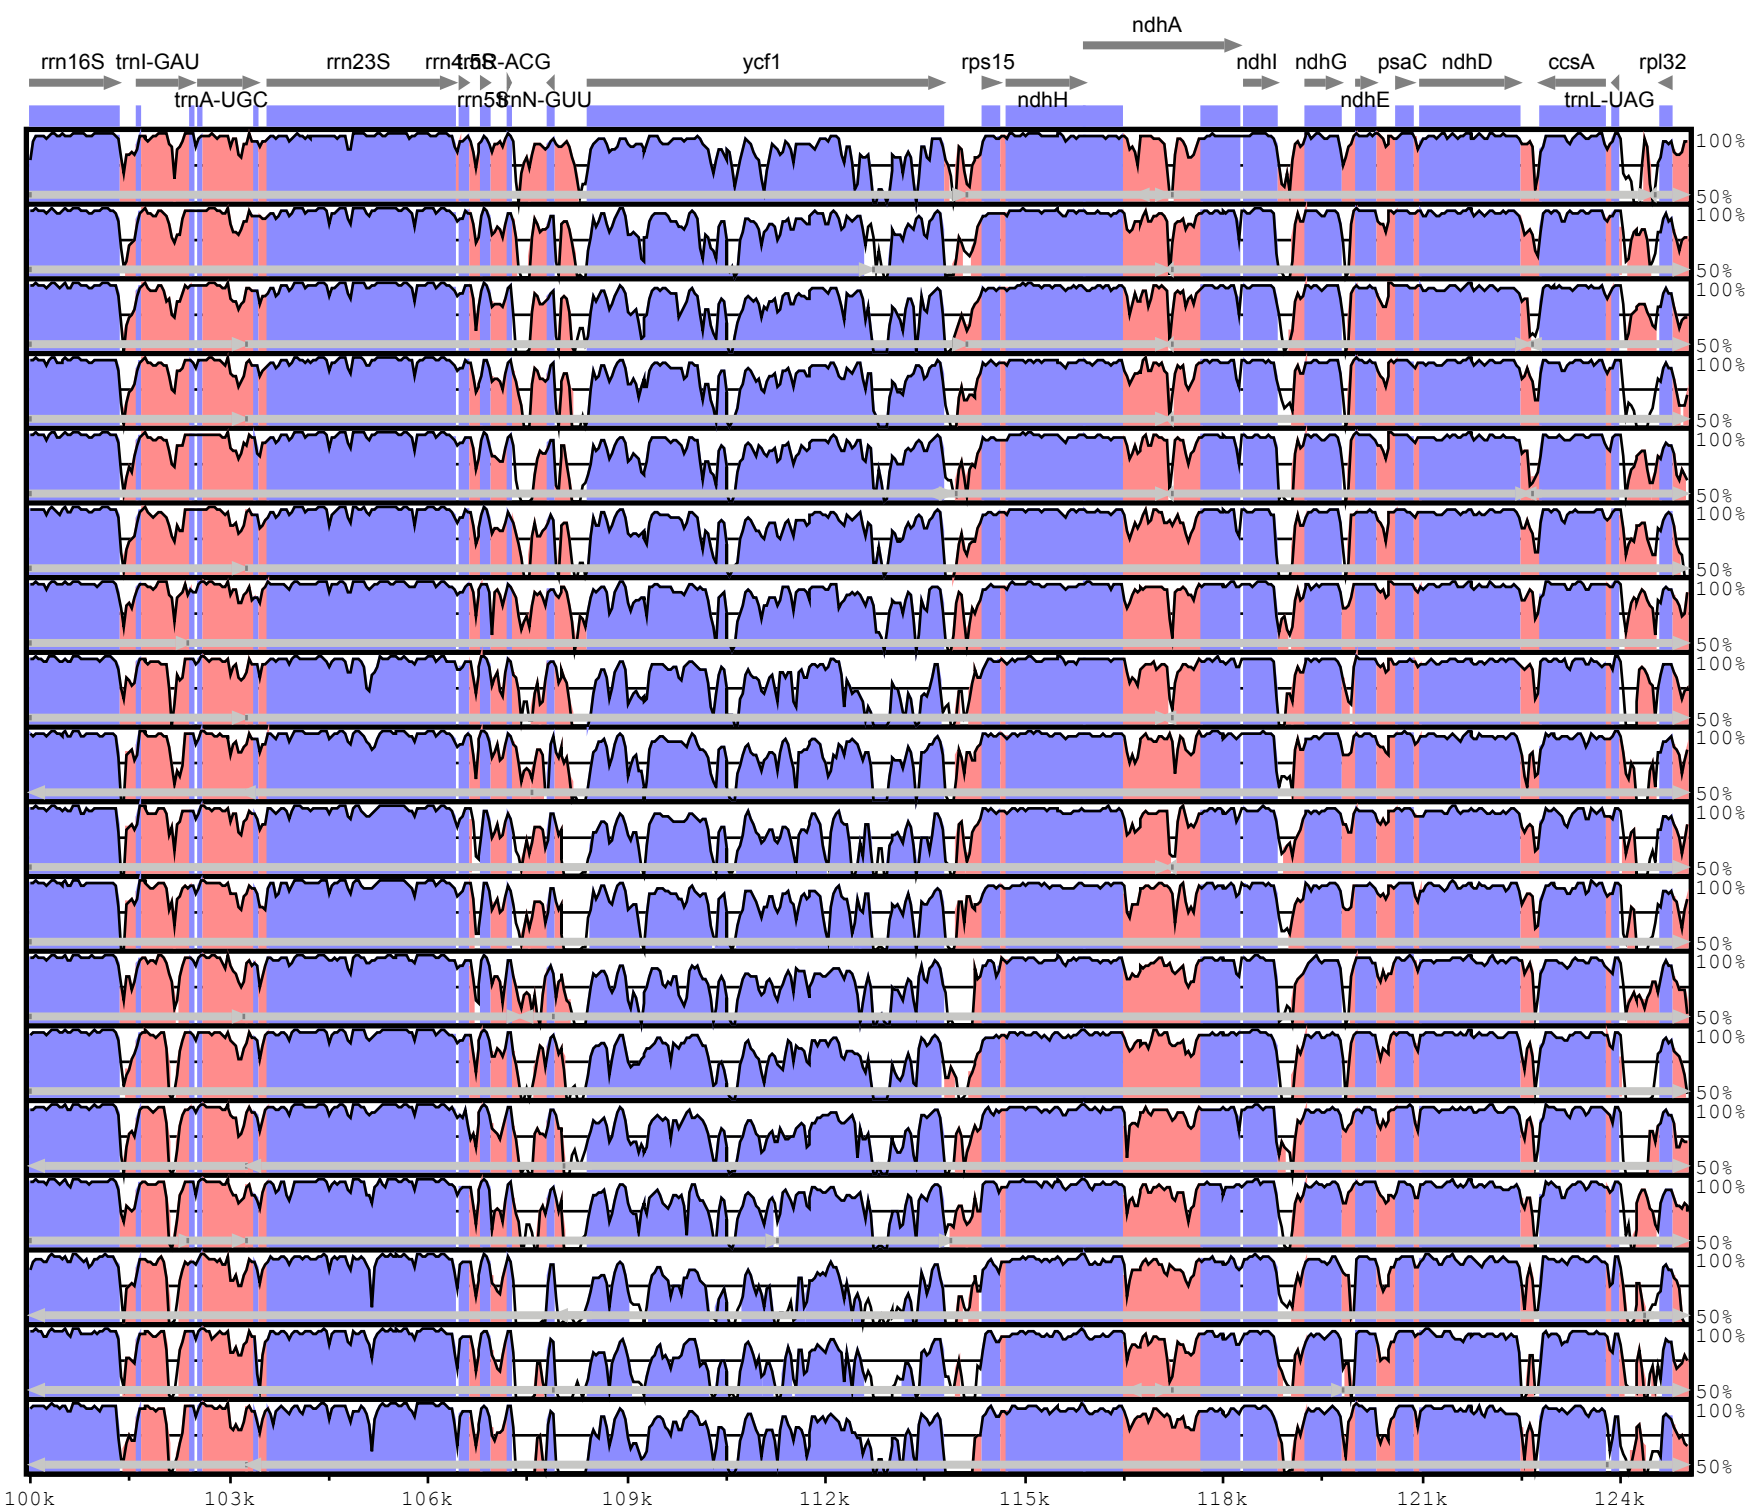

ndhF

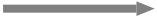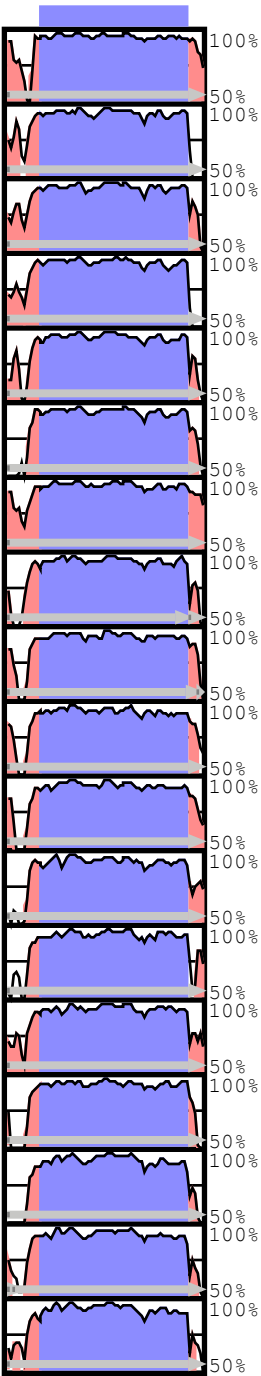

*Wisteria floribunda*

*Astragalus mongholicus*

*Oxytropis bicolor*

*Lessertia frutescens*

*Carmichaelia australis*

*Sphaerophysa salsula*

*Caragana microphylla*

*Tibetia liangshanensis*

*Hedysarum semenovii*

*Onobrychis viciifolia*

*Onobrychis gaubae*

*Cicer arietinum*

*Medicago sativa*

*Trigonella foenum-graecum*

*Trifolium boissieri*

*Lathyrus sativus*

*Pisum sativum*

*Vicia sativa*

125k

Pink bars represent noncoding sequences (CNS), and white peaks represent genomic differences. The y-axis represents the percentage identity (shown: 50-100%).
